# Supplementary material for: Identification of Critical Genes and Pathways for Influenza A Virus Infections via Bioinformatics Analysis
Source: MDPI journal article supplement (doi:10.3390/v14081625), 2022-07-26
Supplement: s1 [file s1]

**Table S1. The selected samples from 8 GEO datasets in this analysis**

| Datasets  | Size | The selected samples                                                      |
|-----------|------|---------------------------------------------------------------------------|
| GSE165340 | 6    | GSM5031744- GSM5031749                                                    |
| GSE97672  | 16   | GSM2575117- GSM2575132                                                    |
| GSE104168 | 18   | GSM2791029- GSM2791037; GSM2791044- GSM2791052                            |
| GSE156152 | 6    | GSM4725672- GSM4725677                                                    |
| GSE163959 | 64   | GSM4991245- GSM4991108                                                    |
| GSE193164 | 6    | GSM5775734; GSM5775735; GSM5775738; GSM5775739;<br>GSM5775742; GSM5775743 |
| GSE186908 | 162  | GSM5663456- GSM5663617                                                    |
| GSE89008  | 20   | GSM2357098- GSM2357117                                                    |
