# Supplementary figures and images for: Identification of Critical Genes and Pathways for Influenza A Virus Infections via Bioinformatics Analysis
Source: MDPI journal article supplement (doi:10.3390/v14081625), 2022-07-26

# Batch corrected

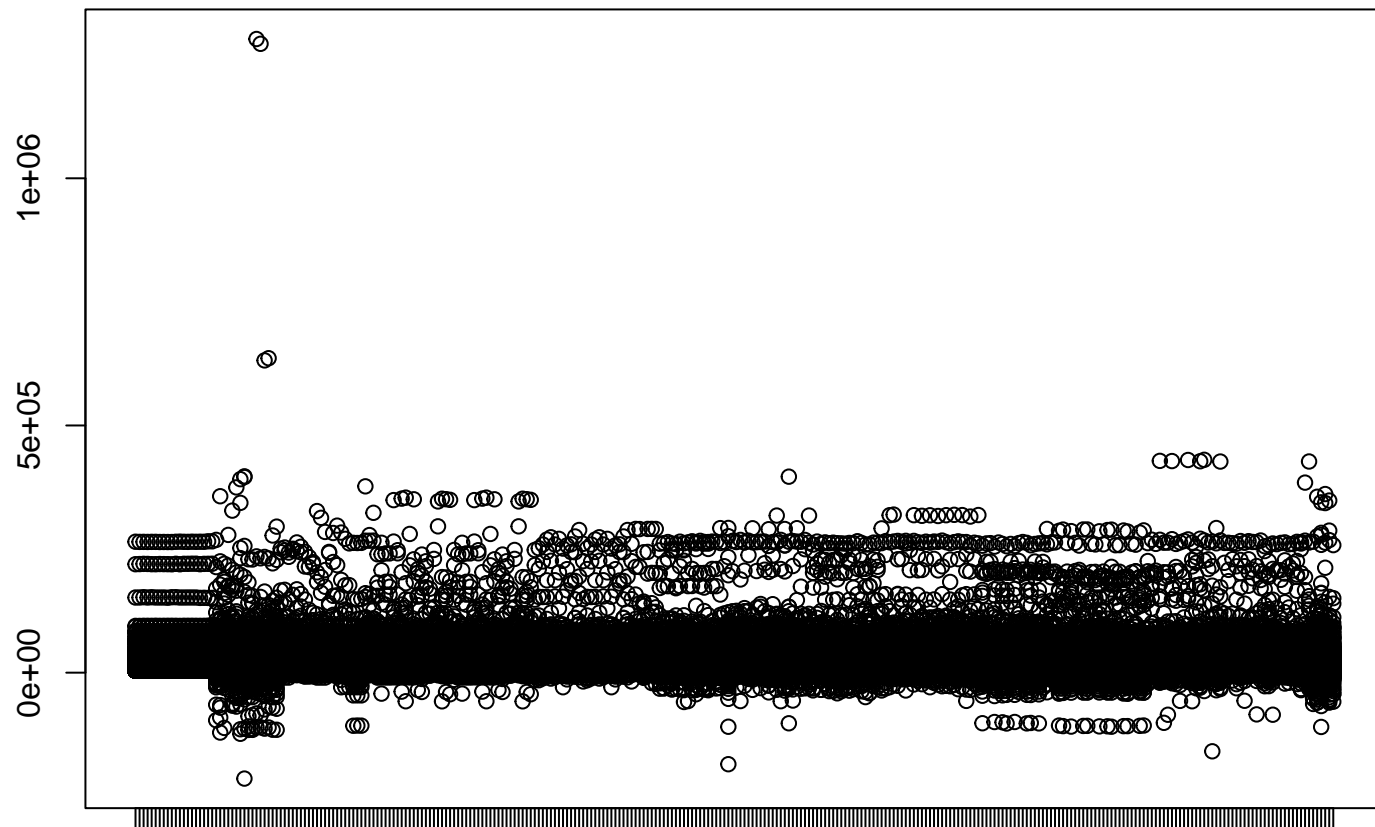

HTBE\_H1N1\_MOI5\_03h\_1 norm.L18 MOCK.2 s2\_A8 s2\_C3 s1\_D9 s2\_F3 s1\_G7

Supplement: s1 [file s1]

# Module-trait

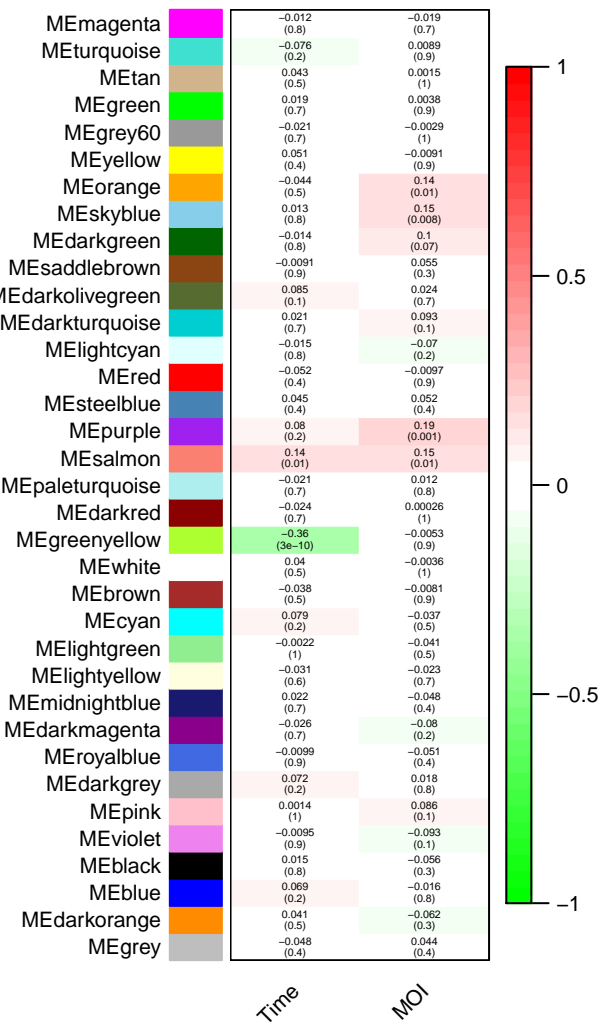

Supplement: s1 [file s1]

### Scale independence

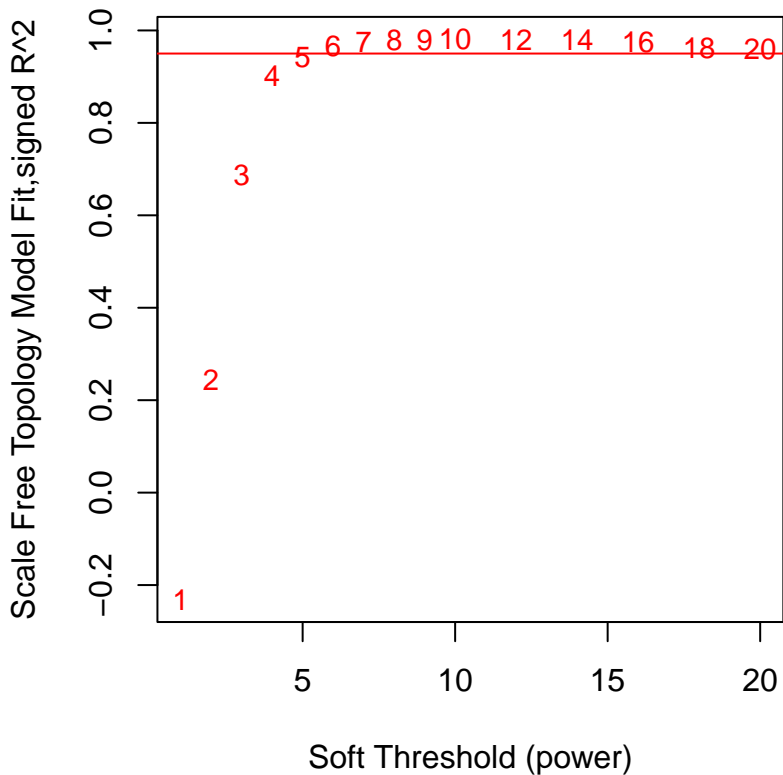

### Mean connectivity

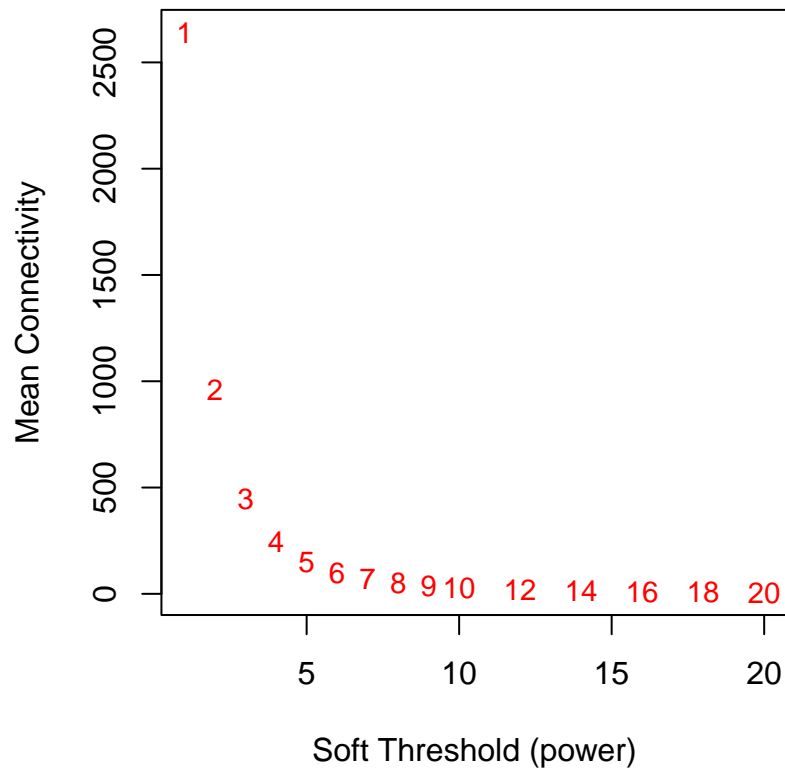

Supplement: s1 [file s1]
